# Supplementary material for: Asproinocybaceae fam. nov. (Agaricales, Agaricomycetes) for Accommodating the Genera Asproinocybe and Tricholosporum, and Description of Asproinocybe sinensis and Tricholosporum guangxiense sp. nov.
Source: MDPI journal article supplement (doi:10.3390/jof7121086), 2021-12-17
Supplement: s1 [file s1]

**Table S1.** Specimens used in phylogenetic analysis and GenBank codes. Newly sequenced collections are in bold.

| Species                                | Voucher/ Strain     | GenBank Accession no. |                    |                 |                 |                 |                 | Reference            |
|----------------------------------------|---------------------|-----------------------|--------------------|-----------------|-----------------|-----------------|-----------------|----------------------|
|                                        |                     | ITS                   | nrLSU              | RPB2            | TEF1- $\alpha$  | RPB1            | nrSSU           |                      |
| <i>Asproinocybe sinensis</i>           | HMJAU59025 Holotype | <b>OK377049</b> *#    | <b>OK377052</b> *# | <b>OK625400</b> | <b>OK625330</b> | <b>OK625397</b> | <b>OK377041</b> | <b>Present study</b> |
| <i>Asproinocybe sinensis</i>           | HMJAU59026          | <b>OK377048</b> *#    | <b>OK377051</b> *# | <b>OK625401</b> | <b>OK625331</b> | <b>OK625398</b> | <b>OK377040</b> | <b>Present study</b> |
| <i>Asproinocybe sinensis</i>           | <b>M2020081289</b>  | -                     | <b>OK576386</b> *# | -               | <b>OK625337</b> | -               | <b>OK624826</b> | <b>Present study</b> |
| <i>Asproinocybe daleyae</i>            | PDD 106796          | MN275025*#            | MN275033*#         | -               | -               | -               | -               | [6]                  |
| <i>Asproinocybe lyophylloides</i>      | PERTH 4163559       | MN275018*#            | MN275027*#         | -               | -               | -               | -               | [6]                  |
| <i>Asproinocybe lyophylloides</i>      | MEL2432747          | MN275015*#            | MN275028*#         | -               | -               | -               | -               | [6]                  |
| <i>Asproinocybe lyophylloides</i>      | PERTH 8477001       | MN275022*#            | MN275030*#         | -               | -               | -               | -               | [6]                  |
| <i>Asproinocybe lyophylloides</i>      | PERTH E6292         | MN275023*#            | MN275031*#         | -               | -               | -               | -               | [6]                  |
| <i>Ampulloclitocybe clavipes</i>       | AFTOL-ID 542        | AY789080              | AY639881           | AY780937        | AY881022        | AY788848        | -               | [35,36]              |
| <i>Anupama indica</i>                  | AMH10033            | MH989590              | MH989586           | MH992117        | -               | -               | -               | [37,38]              |
| <i>Anupama indica</i>                  | CAL1725             | MH989587              | MH989583           | -               | -               | -               | -               | [37,38]              |
| <i>Asterophora lycoperdoides</i>       | CBS170.86           | AF357037              | -                  | DQ367431        | DQ367424        | EF421021        | AF357109        | [32]                 |
| <i>Bonomyces afrosinopicus</i>         | LIP:LYK13040015     | MG696613              | MG696624           | MG702593        | MG702590        | -               | MG696621        | [36]                 |
| <i>Callistosporium graminicolor</i>    | AFTOL978            | DQ484065              | AY745702           | -               | -               | -               | -               | [35,36]              |
| <i>Callistosporium imbricatum</i>      | TJB9847             | HM105568              | HM105568           | HM105567        | -               | -               | -               | [35,38]              |
| <i>Callistosporium imbricatum</i>      | SFSU:DED 8232       | MF100955              | MN017456           | -               | -               | -               | MN017570        | [38]                 |
| <i>Callistosporium luteoolivaceum</i>  | 18231 (AMB)         | MN017518*#&           | MN017459*#&        | -               | -               | -               | -               | [38]                 |
| <i>Callistosporium praemultifolium</i> | SFSU:DED 8238       | MF100956              | MN017464           | MN018844        | -               | -               | MN017575        | [38]                 |
| <i>Callistosporium xanthophyllum</i>   | IB19770276          | AF325667*#&           | AF261406*#&        | -               | -               | -               | -               | [37]                 |
| <i>Catathelasma imperiale</i>          | CORT:11CA01A        | -                     | KR869941           | KC816994        | KC816900        | -               | KR869913        | NCBI                 |
| <i>Catathelasma imperiale</i>          | HKAS 84315          | MK909096              | MK909113           | -               | MK909083        | -               | -               | NCBI                 |
| <i>Cleistocybe carneogrisea</i>        | TENN:063842         | -                     | HQ728527           | -               | -               | -               | HQ728528        | [38]                 |
| <i>Cleistocybe vernalis</i>            | ADP 050506 (WTU)    | EF416917              | EF416916           | -               | -               | -               | -               | [38]                 |
| <i>Clitocybe candicans</i>             | AFTOL-ID 541        | DQ202268              | AY645055           | DQ385881        | DQ408149        | DQ447891        | -               | [32]                 |
| <i>Clitocybe dealbata</i>              | IE-BSG-HC95.cp3     | AF357061              | AF223175           | DQ825407        | EF421080        | DQ825414        | AF357138        | [32,34]              |
| <i>Clitocybe eccentrica</i>            | G0084/ PBM3851      | MG663292              | MK277727           | -               | -               | -               | -               | NCBI                 |

Table S1. Cont.

| Species                        | Voucher/ Strain | GenBank Accession no. |           |          |                |          |          |           |
|--------------------------------|-----------------|-----------------------|-----------|----------|----------------|----------|----------|-----------|
|                                |                 | ITS                   | nrLSU     | RPB2     | TEF1- $\alpha$ | RPB1     | nrSSU    | Reference |
| <i>Clitocybe subditopoda</i>   | AFTOL-ID 533    | DQ202269              | AY691889  | AY780942 | DQ408150       | DQ447892 | -        | [32]      |
| <i>Clitopilus brunneiceps</i>  | KUN-HKAS 80211  | MN061293              | MN065682  | MN148121 | MN166232       | -        | -        | [22]      |
| <i>Clitopilus brunneiceps</i>  | KUN-HKAS 104510 | MN061295              | MN065684  | MN148123 | MN166234       | -        | -        | [22]      |
| <i>Clitopilus rugosiceps</i>   | KUN-HKAS73232   | MN061305              | MN065695  | MN148132 | MN166244       | -        | -        | [22]      |
| <i>Clitopilus rugosiceps</i>   | KUN-HKAS 107044 | MT345046              | MT345051  | -        | -              | -        | -        | [22]      |
| <i>Clitopilus yunnanensis</i>  | KUN-HKAS104518  | MN061308              | MN065698  | MN148136 | MN166247       | -        | -        | [22]      |
| <i>Clitopilus yunnanensis</i>  | HMJAU 24677     | MN061309              | MN065699  | MN148116 | MN166248       | -        | -        | [22]      |
| <i>Clitopilus sinoapalus</i>   | KUN-HKAS101191  | MN061322              | MN065711  | MN148151 | MN166261       | -        | -        | [22]      |
| <i>Clitopilus sinoapalus</i>   | KUN-HKAS 82230  | MN061320              | MN065712  | MN148148 | -              | -        | -        | [22]      |
| <i>Clitopilus umbilicatus</i>  | KUN-HKAS80310   | MN061324              | MN065716  | MN148153 | MN166263       | -        | -        | [22]      |
| <i>Clitopilus umbilicatus</i>  | KUN-HKAS 80945  | MN061326              | MN065718  | MN148155 | MN166265       | -        | -        | [22]      |
| <i>Clitopilus prunulus</i>     | VHAs07/02       | EF421107              | EF421092  | DQ825408 | EF421086       | DQ825416 | EF421097 | [32]      |
| <i>Clitocella orientalis</i>   | KUN-HKAS78763   | -                     | MN065728  | MN148165 | MN166276       | -        | -        | [22]      |
| <i>Clitocella orientalis</i>   | KUN-HKAS 77899  | -                     | MN065725  | MN148162 | MN166273       | -        | -        | [22]      |
| <i>Clitocella mundula</i>      | O:O-F71544      | -                     | -         | KC816950 | KC816860       | -        | -        | [22]      |
| <i>Clitocella mundula</i>      | HMJAU 7275      | MN061331              | MN065723  | MN148160 | MN166271       | -        | -        | [22]      |
| <i>Clitocella fallax</i>       | O:O-F88953      | -                     | -         | KC816936 | KC816845       | -        | -        | [22]      |
| <i>Clitocella fallax</i>       | K: K(M) 116541  | -                     | -         | KC816938 | KC816847       | -        | -        | [22]      |
| <i>Clitocella fallax</i>       | CBS 605.79      | AF357017              | AF223165  | -        | -              | -        | AF357084 | NCBI      |
| <i>Clitopilopsis albida</i>    | KUN-HKAS104519  | MN061335              | MN065730  | MN148167 | MN166278       | -        | -        | [22]      |
| <i>Clitopilopsis albida</i>    | KUN-HKAS104520  | MN061336              | MN065731  | MN148168 | MN166279       | -        | -        | [22]      |
| <i>Collybia tuberosa</i>       | DUKE-AOM191061  | AF274376              | AF261385  | KP255481 | KP255474       | KP255479 | -        | [32]      |
| <i>Dendrocollybia racemosa</i> | DUKE-DEB5575    | DQ825425              | AF042598  | DQ825409 | KP255476       | DQ825417 | KP255472 | [32]      |
| <i>Entocybe nitida</i>         | 24              | KC710122              | GQ289175  | -        | -              | -        | -        | [6]       |
| <i>Entocybe trachyospora</i>   | 414             | KC710121              | GQ289199  | -        | -              | -        | GQ289339 | [31]      |
| <i>Entoloma turbidum</i>       | PRM915266       | FJ824815              | GQ244337  | -        | -              | -        | -        | [6]       |
| <i>Entoloma turbidum</i>       | 27              | KC710060              | GQ289201  | GQ289269 | -              | -        | GQ289341 | [31]      |
| <i>Entoloma hainanense</i>     | GDGM 27990      | NR_137783             | NG_059212 | -        | -              | -        | -        | NCBI      |

Table S1. Cont.

| Species                            | Voucher/ Strain  | GenBank Accession no. |           |          |                |          |          | Reference |
|------------------------------------|------------------|-----------------------|-----------|----------|----------------|----------|----------|-----------|
|                                    |                  | ITS                   | nrLSU     | RPB2     | TEF1- $\alpha$ | RPB1     | nrSSU    |           |
| <i>Entoloma pallidocarpum</i>      | GDGM 28828       | JQ320106              | JQ410331  | JQ993080 | -              | -        | JQ993074 | NCBI      |
| <i>Entoloma perbloomii</i>         | 71               | KC710117              | GQ289178  | GQ289249 | -              | -        | GQ289318 | [31]      |
| <i>Entoloma porphyrophaeum</i>     | VHAs09/02        | EF421111              | -         | -        | EF421090       | EF421053 | EF421101 | [32]      |
| <i>Entoloma porphyrophaeum</i>     | TB6957           | -                     | AF261290  | EF421020 | -              | -        | -        | [32]      |
| <i>Entoloma sericeonitidum</i>     | TB7144           | EF421108              | AF261315  | EF421016 | EF421087       | EF421049 | EF421098 | [32]      |
| <i>Entoloma sericeum</i>           | VHAs03/02        | DQ367430              | DQ367423  | DQ367435 | DQ367428       | DQ825424 | EF421099 | [32]      |
| <i>Entoloma strictius</i>          | DUKE-JM96/10     | EF421109              | AF042620  | EF421017 | EF421088       | EF421050 | EF421100 | [32]      |
| <i>Gerhardtia</i> sp.              | HC01/025         | EF421103              | EF421091  | EF420994 | EF421060       | EF421028 | EF421093 | [32]      |
| <i>Guyanagarika pakaraimensis</i>  | MCA4776          | KX092085              | KX092104  | KX092139 | -              | -        | -        | [34,37]   |
| <i>Guyanagarika anomala</i>        | TH7419           | KX092096              | KX092110  | KX092147 | -              | -        | -        | [37]      |
| <i>Infundibulicybe geotropa</i>    | ALV4344          | KT122792              | KT122793  | -        | -              | -        | -        | [35,38]   |
| <i>Infundibulicybe gibba</i>       | AFTOL-ID 1508    | DQ490635              | DQ457682  | DQ472727 | -              | DQ447913 | -        | [35]      |
| <i>Lepista irina</i>               | AFTOL-ID 815     | DQ221109*             | DQ234538* | DQ385885 | DQ028591       | DQ447919 | -        | [35]      |
| <i>Lepista nebularis</i>           | CBS362.65        | AF357063              | AF223217  | EF421011 | EF421081       | DQ825415 | AF357142 | [35]      |
| <i>Lepista nuda</i>                | DUKE-RV84/1      | AF357062*             | AF042624* | EF421012 | EF421082       | EF421045 | -        | [32]      |
| <i>Leucopaxillus subzonalis</i>    | GB:0087013       | KP453695              | KJ417208  | KJ424385 | -              | -        | -        | [33]      |
| <i>Lyophyllum connatum</i>         | DUKE-JM 90c      | EF421104              | AF042590  | EF420995 | EF421061       | EF421029 | -        | [32]      |
| <i>Lyophyllum decastes</i>         | JM87/16          | AF357059              | AF042583  | DQ367433 | DQ367426       | -        | AF357136 | [32]      |
| <i>Lyophyllum decastes</i>         | JM-Hon/k (T4)    | AF357060              | AF357078  | EF421001 | EF421067       | F421035  | -        | [32]      |
| <i>Lyophyllum favrei</i>           | IE-BSG-HC96cp4   | EF421102              | AF223184  | EF420990 | EF421056       | EF421024 | AF357104 | [32]      |
| <i>Lyophyllum leucophaeatum</i>    | IE-BSG-HAc251.97 | AF357032              | AF223202  | DQ367434 | DQ367427       | DQ825419 | AF357101 | [32]      |
| <i>Lyophyllum semitale</i>         | IE-BSG-HC85/13   | AF357049              | AF042581  | EF421002 | EF421068       | EF421036 | AF357125 | [32]      |
| <i>Macrocybe sardoa</i>            | 29083a (MCVE)    | MN017542              | MN017481  | -        | -              | -        | MN017588 | [38]      |
| <i>Macrocybe titans</i>            | 58974 (FLAS-F)   | MN017545              | MN017484  | -        | MN026908       | -        | MN017589 | [38]      |
| <i>Musumecia bettlachensis</i>     | TO HG2284        | JF926520              | JF926521  | KJ681060 | KJ681082       | -        | KJ681069 | [35]      |
| <i>Musumecia vermicularis</i>      | LUG18975         | -                     | KJ681037  | KJ681061 | KJ681083       | -        | KJ681070 | [35]      |
| <i>Neohygrophorus angelesianus</i> | AFTOL-ID 1719    | DQ494678              | DQ470814  | -        | -              | -        | -        | [30,35]   |
| <i>Ossicaulis lignatilis</i>       | DUKE-D604(VT)    | DQ825426              | AF261397  | DQ825410 | EF421072       | DQ825420 | EF421094 | [32]      |

Table S1. Cont.

| Species                                  | Voucher/ Strain    | GenBank Accession no.  |                        |                 |                 |          |                 | Reference            |
|------------------------------------------|--------------------|------------------------|------------------------|-----------------|-----------------|----------|-----------------|----------------------|
|                                          |                    | ITS                    | nrLSU                  | RPB2            | TEF1- $\alpha$  | RPB1     | nrSSU           |                      |
| <i>Pogonoloma macrocephalum</i>          | TENN:037026        | KP453700               | KJ417209               | -               | -               | -        | KJ417168        | [35]                 |
| <i>Pogonoloma spinulosum</i>             | K(M):107286        | KP453705               | KJ417238               | KJ424401        | -               | -        | KU058571        | [35]                 |
| <i>Porpoloma terreum</i>                 | CONC: F0030        | KJ417306               | KJ417216               | -               | -               | -        | -               | [33]                 |
| <i>Porpoloma terreum</i>                 | REH5830            | KJ417305               | KJ417215               | KJ424391        | -               | -        | -               | [33]                 |
| <i>Porpoloma portentosum</i>             | MES531             | KJ417298               | KJ417210               | KJ424386        | -               | -        | -               | [33]                 |
| <i>Porpoloma</i> sp.                     | DUKE-PR3995        | EF421106               | AF261395               | EF421013        | EF421083        | EF421046 | EF421095        | [32]                 |
| <i>Pseudoclitocybe cyathiformis</i>      | AFTOL 1998         | -                      | EF551313               | GU187815        | GU187742        | -        | GU187659        | [35]                 |
| <i>Pseudoclitopilus rhodoleucus</i>      | GB:0110967         | KP453696               | KJ417218               | KJ424393        | -               | -        | KU058577        | [35]                 |
| <i>Pseudolaccaria fellea</i>             | 006240 (WTU)       | MN017549               | MN017487               | -               | MN026911        | -        | MN017591        | [38]                 |
| <i>Pseudolaccaria pachyphylla</i>        | TR gmb 00672       | NR_153455              | NG_060151              | -               | -               | -        | -               | [38]                 |
| <i>Pseudoarmillariella ectypoides</i>    | AFTOL-ID 1557      | DQ192175               | DQ154111               | DQ474127        | -               | DQ516076 | -               | [35]                 |
| <i>Pseudoomphalina kalchbrenneri</i>     | T0 HG 22102011C    | KR818913               | KR818915               | -               | -               | -        | -               | [35]                 |
| <i>Rhodocybe truncata</i>                | CBS482/50          | EF421110               | AF223167               | EF421019        | KP255478        | EF421052 | AF357086        | [32]                 |
| <i>Suillus pictus</i>                    | AFTOL 717          | AY854069               | AY684154               | AY786066        | AY883429        | AY858965 | AY662659        | [35]                 |
| <i>Tephrocye boudieri</i>                | IE-BSG-BSI96/84    | AF357047               | AF223204               | DQ825411        | EF421070        | DQ825421 | AF357122        | [32]                 |
| <i>Tephrocye striaepilea</i>             | FR2014091          | KP192644               | -                      | KP192524        | -               | -        | -               | NCBI                 |
| <i>Termitomyces microcarpus</i>          | DUKE-PRU3900       | AF357023               | AF042587               | EF421009        | EF421077        | EF421043 | AF357092        | [32]                 |
| <i>Tricholoma myomyces</i>               | DUKE- KMS589       | DQ825428               | U76459                 | DQ367436        | DQ367429        | DQ842013 | EF421096        | [32]                 |
| <i>Tricholoma terreum</i>                | C59300             | EU653300               | EU653304               | -               | -               | -        | JN389400        | NCBI                 |
| <i>Tricholomella constricta</i>          | IE-BSG-HC84/75     | AF357036               | AF223188               | DQ825412        | EF421079        | DQ825422 | AF357105        | [32]                 |
| <i>Tricholosporum goniospermum</i>       | AR122              | KU559861*#&            | -                      | KU559863        | -               | -        | -               | [20]                 |
| <i>Tricholosporum goniospermum</i>       | MS41               | KU559844*#&            | -                      | -               | -               | -        | -               | [20]                 |
| <i>Tricholosporum goniospermum</i>       | PeruMyc2084        | MT707943*#&            | -                      | -               | -               | -        | -               | NCBI                 |
| <i>Tricholosporum porphyrophyllum</i>    | HMJAU24949         | KU954553*#&            | KU954556*#&            | KX397356        | -               | -        | -               | NCBI                 |
| <i>Tricholosporum porphyrophyllum</i>    | H6849              | KU954554*#&            | KU954558*#&            | KX397357        | -               | -        | -               | NCBI                 |
| <i>Tricholosporum porphyrophyllum</i>    | KUBOT-KRMK-2020-94 | MW485792*#&            | MW485793*#&            | -               | -               | -        | -               | NCBI                 |
| <b><i>Tricholosporum guangxiense</i></b> | <b>HMJAU59023</b>  | <b>OK377045*#&amp;</b> | <b>OK377053*#&amp;</b> | <b>OK625399</b> | <b>OK625329</b> | -        | <b>OK624824</b> | <b>Present study</b> |
| <b><i>Tricholosporum guangxiense</i></b> | <b>HMJAU59027</b>  | <b>OK377046*#&amp;</b> | <b>OK377055*#&amp;</b> | <b>OK625402</b> | <b>OK625332</b> | -        | <b>OK377042</b> | <b>Present study</b> |

| Table S1. Cont.                     |                     |                       |             |          |                |      |          |               |
|-------------------------------------|---------------------|-----------------------|-------------|----------|----------------|------|----------|---------------|
| Species                             | Voucher/ Strain     | GenBank Accession no. |             |          |                |      |          |               |
|                                     |                     | ITS                   | nrLSU       | RPB2     | TEF1- $\alpha$ | RPB1 | nrSSU    | Reference     |
| <i>Tricholosporum guangxiense</i>   | HMJAU59028 Holotype | OK377047*#&           | OK377056*#& | OK625403 | OK625333       | -    | OK377043 | Present study |
| <i>Tricholosporum guangxiense</i>   | M2021082219 (IBK)   | -                     | OK576387*#& | -        | OK625335       | -    | OK624827 | Present study |
| <i>Tricholosporum haitangshanum</i> | HMJAU59029          | OK377050*#&           | OK576384*#& | -        | OK625334       | -    | -        | Present study |
| <i>Tricholosporum haitangshanum</i> | HMJAU33972 Holotype | OK576388*#&           | OK576383*#& | -        | OK625338       | -    | OK624823 | Present study |
| <i>Tricholosporum haitangshanum</i> | XJZ20160817         | -                     | OK576385*#& | -        | OK625336       | -    | OK624825 | Present study |
| <i>Tricholosporum</i> sp.           | LG218-1             | MF538719*#&           | -           | -        | -              | -    | -        | NCBI          |
| <i>Tricholosporum</i> sp.           | LG218-9             | MF538721*#&           | -           | -        | -              | -    | -        | NCBI          |
| <i>Xerophorus olivascens</i>        | 18224 (AMB)         | MN017556              | MN017494    | -        | -              | -    | -        | [38]          |
| <i>Xerophorus olivascens</i>        | 18226 (AMB)         | MN017558              | MN017496    | MN018856 | MN026916       | -    | -        | [38]          |

**Note:**

Sequences (GenBank Accession no.) marked with \*, were used in the phylogenetic analyses of **Figure 2**.

Sequences (GenBank Accession no.) marked with #, were used in the phylogenetic analyses of **Figure S1**.

Sequences (GenBank Accession no.) marked with &, were used in the phylogenetic analyses of **Figure S2**.

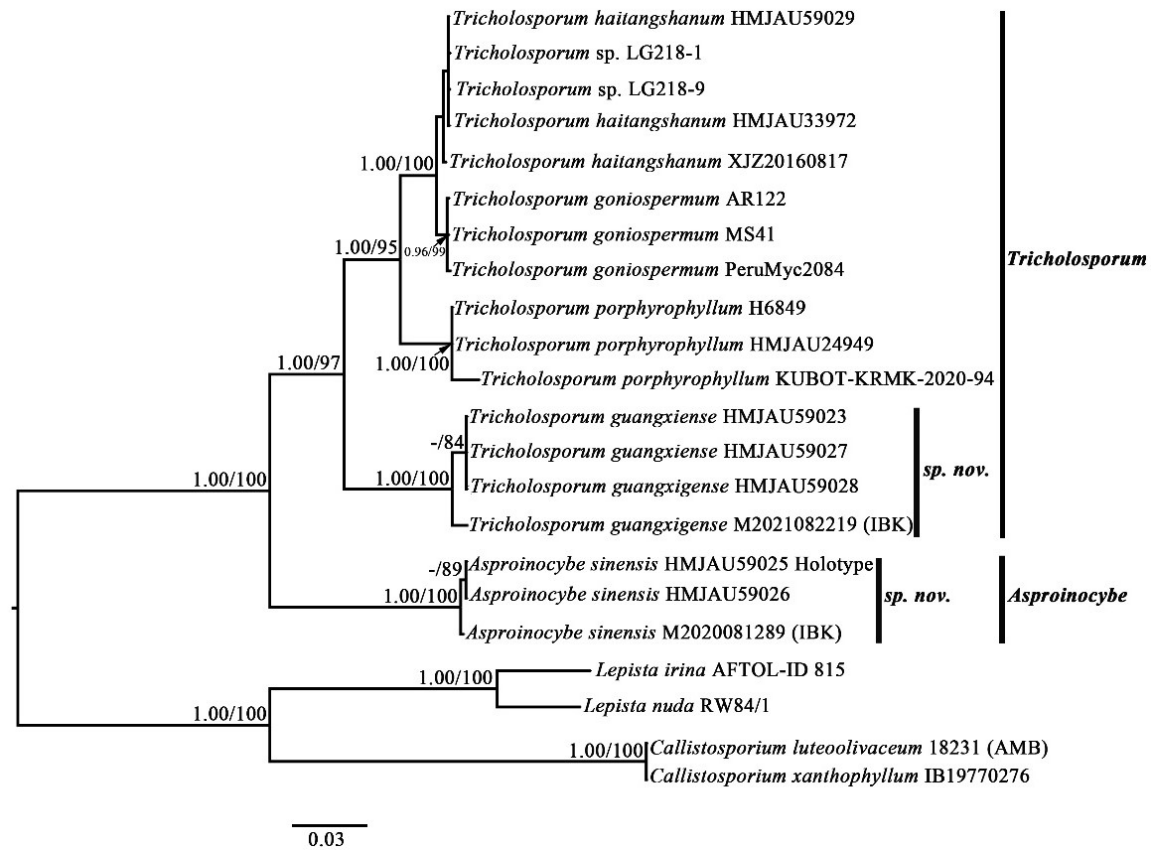

**Figure S1.** Phylogenetic tree inferred from partial ITS+LSU sequences showing phylogenetic relationships of *Asproinocybe* and *Tricholosporum*. Bayesian inference (BPP $\geq$ 0.90) and maximum likelihood support values (ML $\geq$ 70) are shown (BPP/ML).

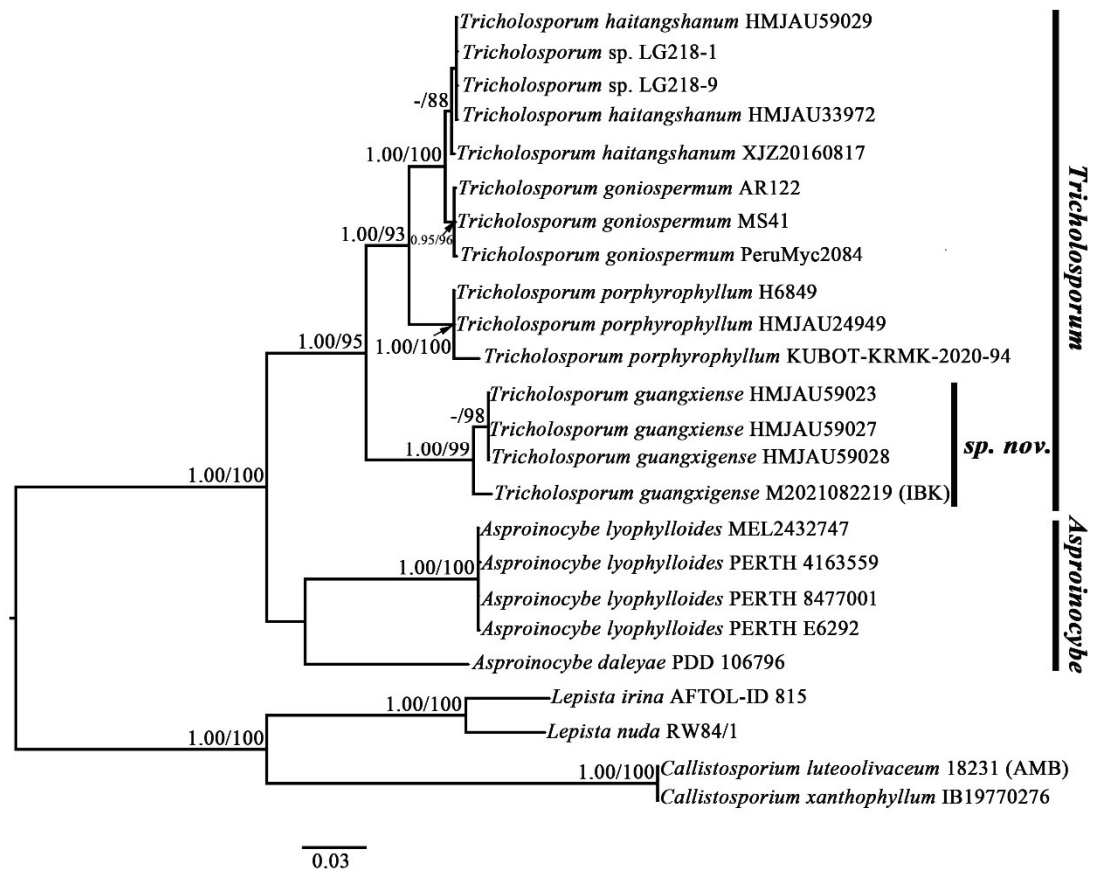

**Figure S2.** Phylogenetic tree inferred from partial ITS+LSU sequences showing phylogenetic relationships of *Asproinocybe* and *Tricholosporum*. Bayesian inference (BPP $\geq$ 0.90) and maximum likelihood support values (ML $\geq$ 70) are shown (BPP/ML)
